# Supplementary material for: Exploring the Association between Emotional Intelligence and Academic Performance and Stress Factors among Dental Students: A Scoping Review
Source: MDPI journal article supplement (doi:10.3390/dj10040067), 2022-04-07
Supplement: s1 [file s1]

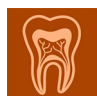

## Supplementary Materials:

**Table S1.** Critical appraisal for qualitative studies using the Critical Appraisal Skills Program (CASP) tool.

| List of Included qualitative studies.                                                                 |                                                          |                                           |                                                                          |                                                                       |                                                                    |                                                                                      |                                                         |                                              |                                         |                               |
|-------------------------------------------------------------------------------------------------------|----------------------------------------------------------|-------------------------------------------|--------------------------------------------------------------------------|-----------------------------------------------------------------------|--------------------------------------------------------------------|--------------------------------------------------------------------------------------|---------------------------------------------------------|----------------------------------------------|-----------------------------------------|-------------------------------|
| Qualitative Studies: CASP Tool                                                                        | Section A: Are the Results Valid?                        |                                           |                                                                          |                                                                       |                                                                    | Section B: What Are the Results?                                                     |                                                         |                                              |                                         |                               |
| Title                                                                                                 | Was there a clear statement of the aims of the research? | Is a qualitative methodology appropriate? | Was the research design appropriate to address the aims of the Research? | Was the recruitment strategy appropriate to the aims of the research? | Was the data collected in a way that addressed the research issue? | Has the relationship between researcher and participants been adequately considered? | Have ethical issues have been taken into consideration? | Was the data analysis sufficiently rigorous? | Is there a clear statement of findings? | How valuable is the research? |
| Emotional intelligence and stress coping in dental undergraduates—a qualitative study                 | +                                                        | +                                         | +                                                                        | +                                                                     | +                                                                  | +                                                                                    | +                                                       | +                                            | +                                       | +                             |
| List of Excluded Qualitative Studies                                                                  |                                                          |                                           |                                                                          |                                                                       |                                                                    |                                                                                      |                                                         |                                              |                                         |                               |
| Qualitative Studies: CASP Tool                                                                        | Section A: Are the Results Valid?                        |                                           |                                                                          |                                                                       |                                                                    | Section B: What Are the Results?                                                     |                                                         |                                              |                                         |                               |
| Reference                                                                                             | Was there a clear statement of the aims of the research? | Is a qualitative methodology appropriate? | Was the research design appropriate to address the aims of the research? | Was the recruitment strategy appropriate to the aims of the research? | Was the data collected in a way that addressed the research issue? | Has the relationship between researcher and participants been adequately considered? | Have ethical issues have been taken into consideration? | Was the data analysis sufficiently rigorous? | Is there a clear statement of findings? | How valuable is the research? |
| The effect of Emotional Intelligence on Research Quality and Teaching skills of Faculty in University | +                                                        | +                                         | +                                                                        | –                                                                     | –                                                                  | +                                                                                    | +                                                       | –                                            | –                                       | –                             |
| Robinson, P.G. Perceptions of professionalism in dentistry—a qualitative study.                       | +                                                        | +                                         | +                                                                        | –                                                                     | +                                                                  | –                                                                                    | +                                                       | +                                            | –                                       | –                             |

(+) = item adequately addressed, (–) = item not adequately addressed, (+/–) = item partially addressed.

**Table S2.** Critical appraisal for cross-sectional studies using the Appraisal tool for Cross-Sectional Studies (AXIS).

[illegible]

[illegible]

[illegible]

|                                                                                                                       |                                              |                                                         |                                |                                                                                                |                                                                                                                                                    |                                                                                                                                                   |                                                                    |                                                                                             |                                                                                                                                                       |                                                                                                                                    |                                                                                                        |   |
|-----------------------------------------------------------------------------------------------------------------------|----------------------------------------------|---------------------------------------------------------|--------------------------------|------------------------------------------------------------------------------------------------|----------------------------------------------------------------------------------------------------------------------------------------------------|---------------------------------------------------------------------------------------------------------------------------------------------------|--------------------------------------------------------------------|---------------------------------------------------------------------------------------------|-------------------------------------------------------------------------------------------------------------------------------------------------------|------------------------------------------------------------------------------------------------------------------------------------|--------------------------------------------------------------------------------------------------------|---|
| intelligence of engineering and dental college students                                                               |                                              |                                                         |                                |                                                                                                |                                                                                                                                                    |                                                                                                                                                   |                                                                    |                                                                                             |                                                                                                                                                       |                                                                                                                                    |                                                                                                        |   |
| Perceived stress among dental students at the University of the Western Cape                                          |                                              |                                                         |                                |                                                                                                |                                                                                                                                                    |                                                                                                                                                   |                                                                    |                                                                                             |                                                                                                                                                       |                                                                                                                                    |                                                                                                        |   |
|                                                                                                                       | +                                            | +                                                       | +                              | +                                                                                              | +                                                                                                                                                  | +                                                                                                                                                 | +                                                                  | +                                                                                           | +                                                                                                                                                     | +                                                                                                                                  | +                                                                                                      | + |
| What is the relationship between emotional intelligence and dental student clinical performance?                      |                                              |                                                         |                                |                                                                                                |                                                                                                                                                    |                                                                                                                                                   |                                                                    |                                                                                             |                                                                                                                                                       |                                                                                                                                    |                                                                                                        |   |
|                                                                                                                       | +                                            | +                                                       | +                              | +                                                                                              | +                                                                                                                                                  | +                                                                                                                                                 | +                                                                  | +                                                                                           | +                                                                                                                                                     | +                                                                                                                                  | +                                                                                                      | + |
| Relationship between emotional intelligence and academic satisfaction in dental students and paramedic students.      |                                              |                                                         |                                |                                                                                                |                                                                                                                                                    |                                                                                                                                                   |                                                                    |                                                                                             |                                                                                                                                                       |                                                                                                                                    |                                                                                                        |   |
|                                                                                                                       | +                                            | +                                                       | +                              | +                                                                                              | +                                                                                                                                                  | +                                                                                                                                                 | +                                                                  | +                                                                                           | +                                                                                                                                                     | +                                                                                                                                  | +                                                                                                      | + |
| List of Excluded Cross-Sectional Studies                                                                              |                                              |                                                         |                                |                                                                                                |                                                                                                                                                    |                                                                                                                                                   |                                                                    |                                                                                             |                                                                                                                                                       |                                                                                                                                    |                                                                                                        |   |
| Cross-Sectional Studies CASP Tool                                                                                     |                                              | Introduction                                            |                                |                                                                                                |                                                                                                                                                    |                                                                                                                                                   |                                                                    | Method                                                                                      |                                                                                                                                                       |                                                                                                                                    |                                                                                                        |   |
| Reference                                                                                                             | Were the aims/objectives of the study clear? | Was the study design appropriate for the stated aim(s)? | Was the sample size justified? | Was the target/reference population clearly defined? (is it clear who the research was about?) | Was the sample frame taken from an appropriate population base so that it closely represented the target/reference population under investigation? | Was the selection process likely to select subjects/participants that were representative of the target/reference population under investigation? | Were measures undertaken to address and categorize non-responders? | Were the risk factor and outcome variables measured appropriately to the aims of the study? | Were the risk factors and outcome variables measured correctly using instruments/measurements that had been trialed, piloted or published previously? | Is it clear what was used to determine statistical significance and/or precision estimates? (e.g., p-values, confidence intervals) | Were the methods (including statistical methods) sufficiently described to enable them to be repeated? |   |
| The impact of maternal emotional intelligence and parenting style on child anxiety and behavior in the dental setting | +                                            | +                                                       | −                              | −                                                                                              | −                                                                                                                                                  | +                                                                                                                                                 | −                                                                  | +                                                                                           | −                                                                                                                                                     | +                                                                                                                                  | −                                                                                                      |   |
| Factors affecting clinical dental hygienist                                                                           | +                                            | +                                                       | +                              | −                                                                                              | −                                                                                                                                                  | +                                                                                                                                                 | −                                                                  | −                                                                                           | +                                                                                                                                                     | +                                                                                                                                  | −                                                                                                      |   |





|                                                                                                                                           |                                           |                                                                |                                                                 |                                         |                                                                           |                                                                         |                                              |                                                                                                                     |                                                           |
|-------------------------------------------------------------------------------------------------------------------------------------------|-------------------------------------------|----------------------------------------------------------------|-----------------------------------------------------------------|-----------------------------------------|---------------------------------------------------------------------------|-------------------------------------------------------------------------|----------------------------------------------|---------------------------------------------------------------------------------------------------------------------|-----------------------------------------------------------|
| Emotional intelligence among Alexandria University dental interns                                                                         | +                                         | +                                                              | +                                                               | +                                       | +                                                                         | +                                                                       | +                                            | +                                                                                                                   | +                                                         |
| Emotional intelligence of Pedodontics and Preventive Dentistry postgraduate students in India.                                            | +                                         | +                                                              | +                                                               | +                                       | +                                                                         | +                                                                       | +                                            | +                                                                                                                   | +                                                         |
| Association between emotional intelligence and perceived stress in undergraduate dental students.                                         | +                                         | +                                                              | +                                                               | +                                       | +                                                                         | +                                                                       | +                                            | +                                                                                                                   | +                                                         |
| The relationship between depression and emotional intelligence quotient among the medical and dental students of Nishtar College, Multan. | +                                         | +                                                              | +                                                               | +                                       | +                                                                         | +                                                                       | +                                            | +                                                                                                                   | +                                                         |
| Self-compassion and emotional intelligence of engineering and dental college students                                                     | +                                         | +                                                              | +                                                               | +                                       | +                                                                         | +                                                                       | +                                            | +                                                                                                                   | +                                                         |
| Perceived stress among dental students at the University of the Western Cape                                                              | +                                         | +                                                              | +                                                               | +                                       | +                                                                         | +                                                                       | +                                            | +                                                                                                                   | +                                                         |
| What is the relationship between emotional intelligence and dental student clinical performance?                                          | +                                         | +                                                              | +                                                               | +                                       | +                                                                         | +                                                                       | +                                            | +                                                                                                                   | +                                                         |
| Relationship between emotional intelligence and academic satisfaction in dental students and paramedic students.                          | +                                         | +                                                              | +                                                               | +                                       | +                                                                         | +                                                                       | +                                            | +                                                                                                                   | +                                                         |
| List of Excluded Cross-Sectional Studies                                                                                                  |                                           |                                                                |                                                                 |                                         |                                                                           |                                                                         |                                              |                                                                                                                     |                                                           |
| Cross-Sectional Studies CASP Tool                                                                                                         | Results                                   |                                                                |                                                                 |                                         | Discussion                                                                |                                                                         |                                              | Others                                                                                                              |                                                           |
| Reference                                                                                                                                 | Were the basic data adequately described? | Does the response rate raise concerns about non-response bias? | If appropriate, was information about non-responders described? | Were the results internally consistent? | Were the results presented for all the analyses described in the methods? | Were the authors' discussions and conclusions justified by the results? | Were the limitations of the study discussed? | Were there any funding sources or conflicts of interest that may affect the authors' interpretation of the results? | Was ethical approval or consent of participants attained? |
| The impact of maternal emotional intelligence and parenting style on child anxiety and behavior in the dental setting                     | +                                         | –                                                              | –                                                               | +                                       | –                                                                         | –                                                                       | +                                            | +                                                                                                                   | +                                                         |



|                                                                                                                             |     |     |   |   |   |   |   |   |     |
|-----------------------------------------------------------------------------------------------------------------------------|-----|-----|---|---|---|---|---|---|-----|
| Factors affecting clinical dental hygienist emotional intelligence on burnout                                               | +   | +/- | + | - | - | + | - | - | +   |
| Relationships among emotional intelligence, ego resilience, stress in clinical practice of dental hygiene students          | +/- | +   | - | - | + | - | - | + | +/- |
| The relationship between emotional intelligence and academic achievement in the dental students of Babol Medical University | -   | +   | - | - | + | - | - | + | +   |
| Empathy and emotional intelligence in dental practitioners of Bareilly City—a cross sectional study.                        | +   | -   | - | + | - | - | + | + | +   |

(+) = item adequately addressed, (-) = item not adequately addressed, (+/-) = item partially addressed.
